# Supplementary material
Source: MDPI journal article supplement (https://www.mdpi.com/2071-1050/12/18/7502)
Supplement: s1 [file s1]

# Questionnaire "University and sustainability"

This study will help University to improve its strategy towards students education for sustainable development

\* Required

## 1. GENERAL INFORMATION \*

*Mark only one oval.*

☐ Female

☐ Male

## 2. Age \*

*Mark only one oval.*

☐ <18

☐ 18-20

☐ 21-25

☐ 26 – 30

☐ 31-40

☐ > 41

## 3. Nationality: \*

*Mark only one oval.*

☐ Spanish

☐ Foreign - European Union Country

☐ Foreign - Non European Union Country

## 4. Education \*

*Mark only one oval.*

- ☐ Bachelor's
- ☐ Master's
- ☐ Ph.D

## 5. Faculty \*

*Mark only one oval.*

- ☐ Sciences
- ☐ Business and Economics
- ☐ Law
- ☐ Philosophy and Letters
- ☐ Teacher Training and Education
- ☐ Medicine
- ☐ Engineering
- ☐ Psychology

## 6. Academic level \*

*Mark only one oval.*

- ☐ Year 1
- ☐ Year 2
- ☐ Year 3
- ☐ Year 4
- ☐ > Year 4

7. Where do you live? \*

*Mark only one oval.*

- ☐ Family
- ☐ Rent
- ☐ Student Residence outside of campus
- ☐ Student Residence on campus

8. What is your postal code? \*

---

## 9. PART 1: KNOWLEDGE 1.1 Knowledge about sustainability from a political and socio-economic perspective \*

Mark only one oval per row.

|                                                                                           | Disagree.             | Partially disagree    | Neutral               | Partially agree       | Agree                 |
|-------------------------------------------------------------------------------------------|-----------------------|-----------------------|-----------------------|-----------------------|-----------------------|
| I'm familiar with the concept of ecosystems, its interdependency cycles and diversity     | <input type="radio"/> |
| I'm familiar with the concept of sustainable development                                  | <input type="radio"/> |
| Sustainability is an urgency                                                              | <input type="radio"/> |
| Sustainability is an opportunity according to an ecological and social perspective        | <input type="radio"/> |
| Local structures, economic systems and governance are important to achieve sustainability | <input type="radio"/> |
| Water, energy, and food consumption are irrelevant as sustainable resources               | <input type="radio"/> |

## 10. PART 1: KNOWLEDGE 1.2 Knowledge about sustainability from an educational and cultural perspective \*

Mark only one oval per row.

|                                                                                                                                            | Disagree              | Partially disagree    | Neutral               | Partially agree       | Agree                 |
|--------------------------------------------------------------------------------------------------------------------------------------------|-----------------------|-----------------------|-----------------------|-----------------------|-----------------------|
| Education and culture are not essential to achieve sustainability                                                                          | <input type="radio"/> |
| Initiatives towards sustainability (like UN MDGs, Global Compact, GIEC, GRI, ISO 26 000, ESD, etc.) are fundamental                        | <input type="radio"/> |
| An efficient action (at individual, organization or region level) can create both individual and systemic change to achieve sustainability | <input type="radio"/> |

## PART 2: BEHAVIORS

11. 2.1 Statements to assess behaviors related to sustainability (recycling, energy, water, mobility, etc.) \*

Mark only one oval per row.

|                                                                                  | Disagree              | Partially disagree    | Neutral               | Partially agree       | Agree                 |
|----------------------------------------------------------------------------------|-----------------------|-----------------------|-----------------------|-----------------------|-----------------------|
| I deliberately purchase food produced locally rather than imported products.     | <input type="radio"/> |
| I eat less red meat due to its environmental impact when compared to other foods | <input type="radio"/> |
| I attend protest marches or demonstrations for environmental reasons.            | <input type="radio"/> |
| I purchase products packaged in reusable or recyclable containers.               | <input type="radio"/> |
| I avoid buying from a company, which shows disregard for the environment.        | <input type="radio"/> |
| I pick up litter or trash in the street                                          | <input type="radio"/> |
| I recycle glass bottles, aluminum cans or paper.                                 | <input type="radio"/> |

I try to use less  
energy  
(electricity,  
water etc.)

☐☐☐☐☐

I turn off lights  
when I am the  
last to leave a  
room.

☐☐☐☐☐

I make an  
effort to use  
less water  
when brushing  
my teeth or  
bathing.

☐☐☐☐☐

## 12. 2.2 Statements to assess behaviors related to sustainability (implications). \*

Mark only one oval per row.

|                                                                                                   | Disagree              | Partially disagree    | Neutral               | Partially agree       | Agree                 |
|---------------------------------------------------------------------------------------------------|-----------------------|-----------------------|-----------------------|-----------------------|-----------------------|
| I consider politicians' positions related to environmental and sustainability issues when voting. | <input type="radio"/> |
| I choose to read publications or watch media that focus on sustainability issues.                 | <input type="radio"/> |
| I encourage people involved in a destructive environmental behavior to stop that activity.        | <input type="radio"/> |
| I encourage others to take action on behalf of sustainable development.                           | <input type="radio"/> |
| I defend equality (e.g. gender, human/cultural diversity) and justice                             | <input type="radio"/> |
| I buy from a company, which shows social responsibility                                           | <input type="radio"/> |



(e.g. fair trade)

I apply labor  
rules and  
human rights  
in my daily  
tasks

☐☐☐☐☐

I act with  
ethical values  
and against  
corruption

☐☐☐☐☐

## 13. PART 3: ATTITUDES 3.1 Attitudes toward university responsibility for sustainability \*

Mark only one oval per row.

|                                                                                                    | Disagree              | Partially disagree    | Neutral               | Partially agree       | Agree                 |
|----------------------------------------------------------------------------------------------------|-----------------------|-----------------------|-----------------------|-----------------------|-----------------------|
| I believe that everything depends on nature.                                                       | <input type="radio"/> |
| I respect and care for the community of life, now and in the future                                | <input type="radio"/> |
| I treat others, as I would like them to treat me                                                   | <input type="radio"/> |
| I'm actively committed to solve sustainability problems (e.g. by reducing my consumption patterns) | <input type="radio"/> |
| I belief one can initiate and reinforce personal and systemic changes towards sustainability       | <input type="radio"/> |
| I'm motivated to learn about sustainability issues.                                                | <input type="radio"/> |
| I want to participate in my university's                                                           | <input type="radio"/> |

initiatives  
related to  
sustainability

---

## 14. 3.2 Attitudes toward university responsibility for sustainability \*

Mark only one oval per row.

|                                                                                                                                   | Disagree              | Partially disagree    | Neutral               | Partially agree       | Agree                 |
|-----------------------------------------------------------------------------------------------------------------------------------|-----------------------|-----------------------|-----------------------|-----------------------|-----------------------|
| I believe that my university should make sustainability a priority in campus planning, development, and day-to-day operations.    | <input type="radio"/> |
| I believe that everyone in my university's community should participate in the implementation of sustainability at the university | <input type="radio"/> |
| I believe it is necessary for my university's community to include education about sustainability across the curriculum           | <input type="radio"/> |
| I believe that my university should have a strategy or policy for sustainability implementation                                   | <input type="radio"/> |

15. What are the most common means of transportation when commuting to the university?

*Mark only one oval.*

- ☐ Walk
- ☐ Bicycle
- ☐ Metro
- ☐ Bus
- ☐ Car
- ☐ Carpooling
- ☐ Train
- ☐ Other
- ☐ Option 9
- ☐ Option 10
- ☐ Option 11
- ☐ Option 12
- ☐ Option 13
- ☐ Option 14
- ☐ Option 15
- ☐ Option 16
- ☐ Option 17
- ☐ Option 18
- ☐ Option 19
- ☐ Option 20
- ☐ Option 21
- ☐ Option 22

16. If you frequently use another means of transportation to get to the university, indicate which and its main reason:

---

17. If you use more than one means of transportation, please indicate your itinerary in order from your home to the university:

*Mark only one oval per row.*

|            | 1°<br>Mode            | 2°<br>Mode            | 3°<br>Mode            |
|------------|-----------------------|-----------------------|-----------------------|
| Walk       | <input type="radio"/> | <input type="radio"/> | <input type="radio"/> |
| Metro      | <input type="radio"/> | <input type="radio"/> | <input type="radio"/> |
| Train      | <input type="radio"/> | <input type="radio"/> | <input type="radio"/> |
| Bus        | <input type="radio"/> | <input type="radio"/> | <input type="radio"/> |
| Car        | <input type="radio"/> | <input type="radio"/> | <input type="radio"/> |
| Carpooling | <input type="radio"/> | <input type="radio"/> | <input type="radio"/> |
| Other      | <input type="radio"/> | <input type="radio"/> | <input type="radio"/> |

18. How long does it take to go from your home to the university? \*

*Mark only one oval.*

- ☐ <20 minutes
- ☐ 20 a 39 minutes
- ☐ 40 a 59 minutes
- ☐ 60 a 89 minutes
- ☐ >90 minutes

19. How much money do you spend on transportation from your home to the university per month? \*

*Mark only one oval.*

- ☐ <10 euros
- ☐ 10-30 euros
- ☐ 30-60 euros
- ☐ 60-90 euros
- ☐ 90-120 euros
- ☐ >120 euros

#### Part 4. Sustainability implementation at UAM

20. 4.1 Which of the following methodologies have been more commonly applied through your educational process at UAM? \*

*Check all that apply.*

- ☐ Case studies
- ☐ Inter-disciplinary team teaching
- ☐ Lecturing
- ☐ Mind and concept maps
- ☐ Project- or Problem-based learning

21. 4.2 What would you highlight in your training in order to be educated in sustainability? \*

*Check all that apply.*

- ☐ Critical thinking and analysis
- ☐ Interpersonal relations and collaboration
- ☐ Empathy and change of perspective
- ☐ Communication and use of media
- ☐ Strategic action
- ☐ Personal involvement
- ☐ Assessment and evaluation
- ☐ Tolerance for ambiguity and uncertainty
- ☐ Team work and consensus building

## 22. 4.3 In your opinion, what are the main sustainability problems of UAM? \*

*Check all that apply.*

- ☐ None
- ☐ Waste management and selective collection failures
- ☐ Excessive consumption of resources (e.g. energy, water)
- ☐ Lack of involvement in social problems
- ☐ Lack of infrastructures or policies for students with disabilities
- ☐ Do not know /Do not answer
- ☐ Other

## 23. 4.4 4 Statements about the university's role in sustainable development implementation \*

*Check all that apply.*

- ☐ University contributes to inclusion of sustainability aspects in study contents
- ☐ University promotes sustainability research
- ☐ University as a policy/strategy or program for sustainable development implementation
- ☐ University has a sustainable campus
- ☐ University engages stakeholders (from inside and outside university) towards sustainability

Other: ☐ \_\_\_\_\_

---

This content is neither created nor endorsed by Google.

Google Forms
